# Supplementary material
Source: Research Square preprint supplement (doi:10.21203/rs.3.rs-9217563/v1)
Supplement: Supplementary file 1 [file cefa669418392cb0d490fc6f.docx]

**Supplementary data**


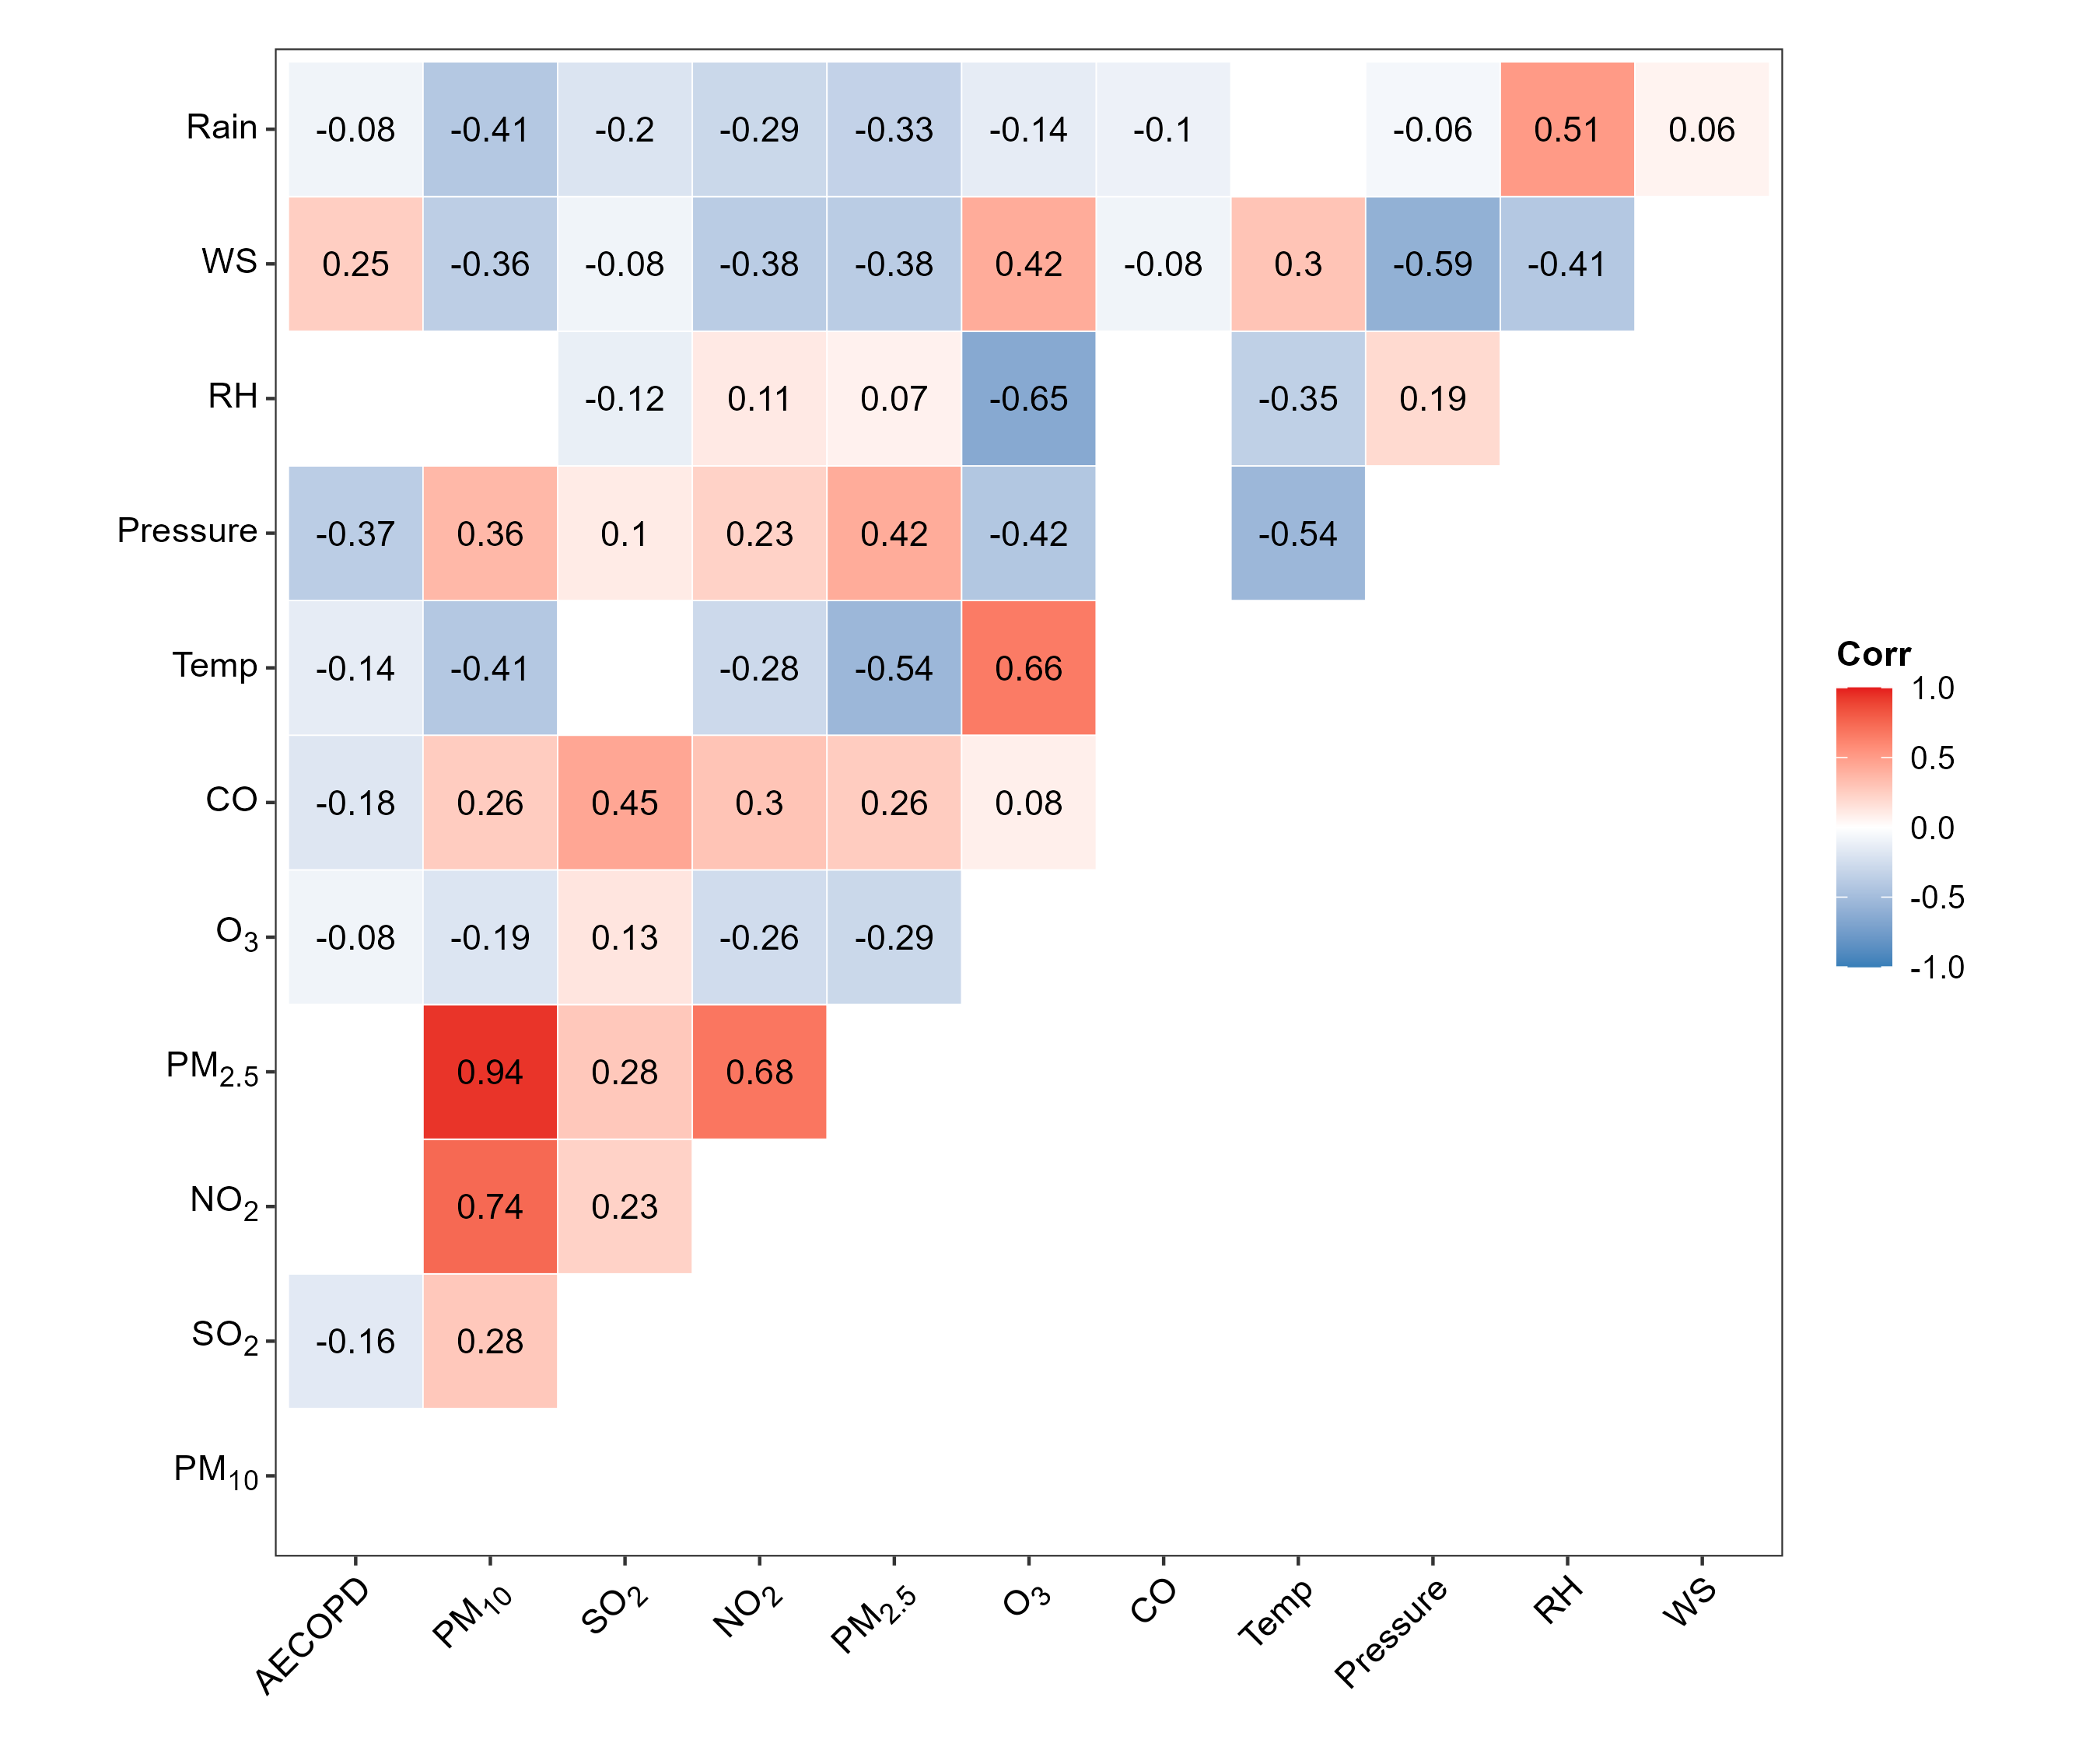


Figure S1. Correlation analysis of air pollutants and meteorological factors with the number of AECOPD hospitalizations





Figure S2. Subgroup analysis of the association between air pollutants and the risk of AECOPD hospitalization


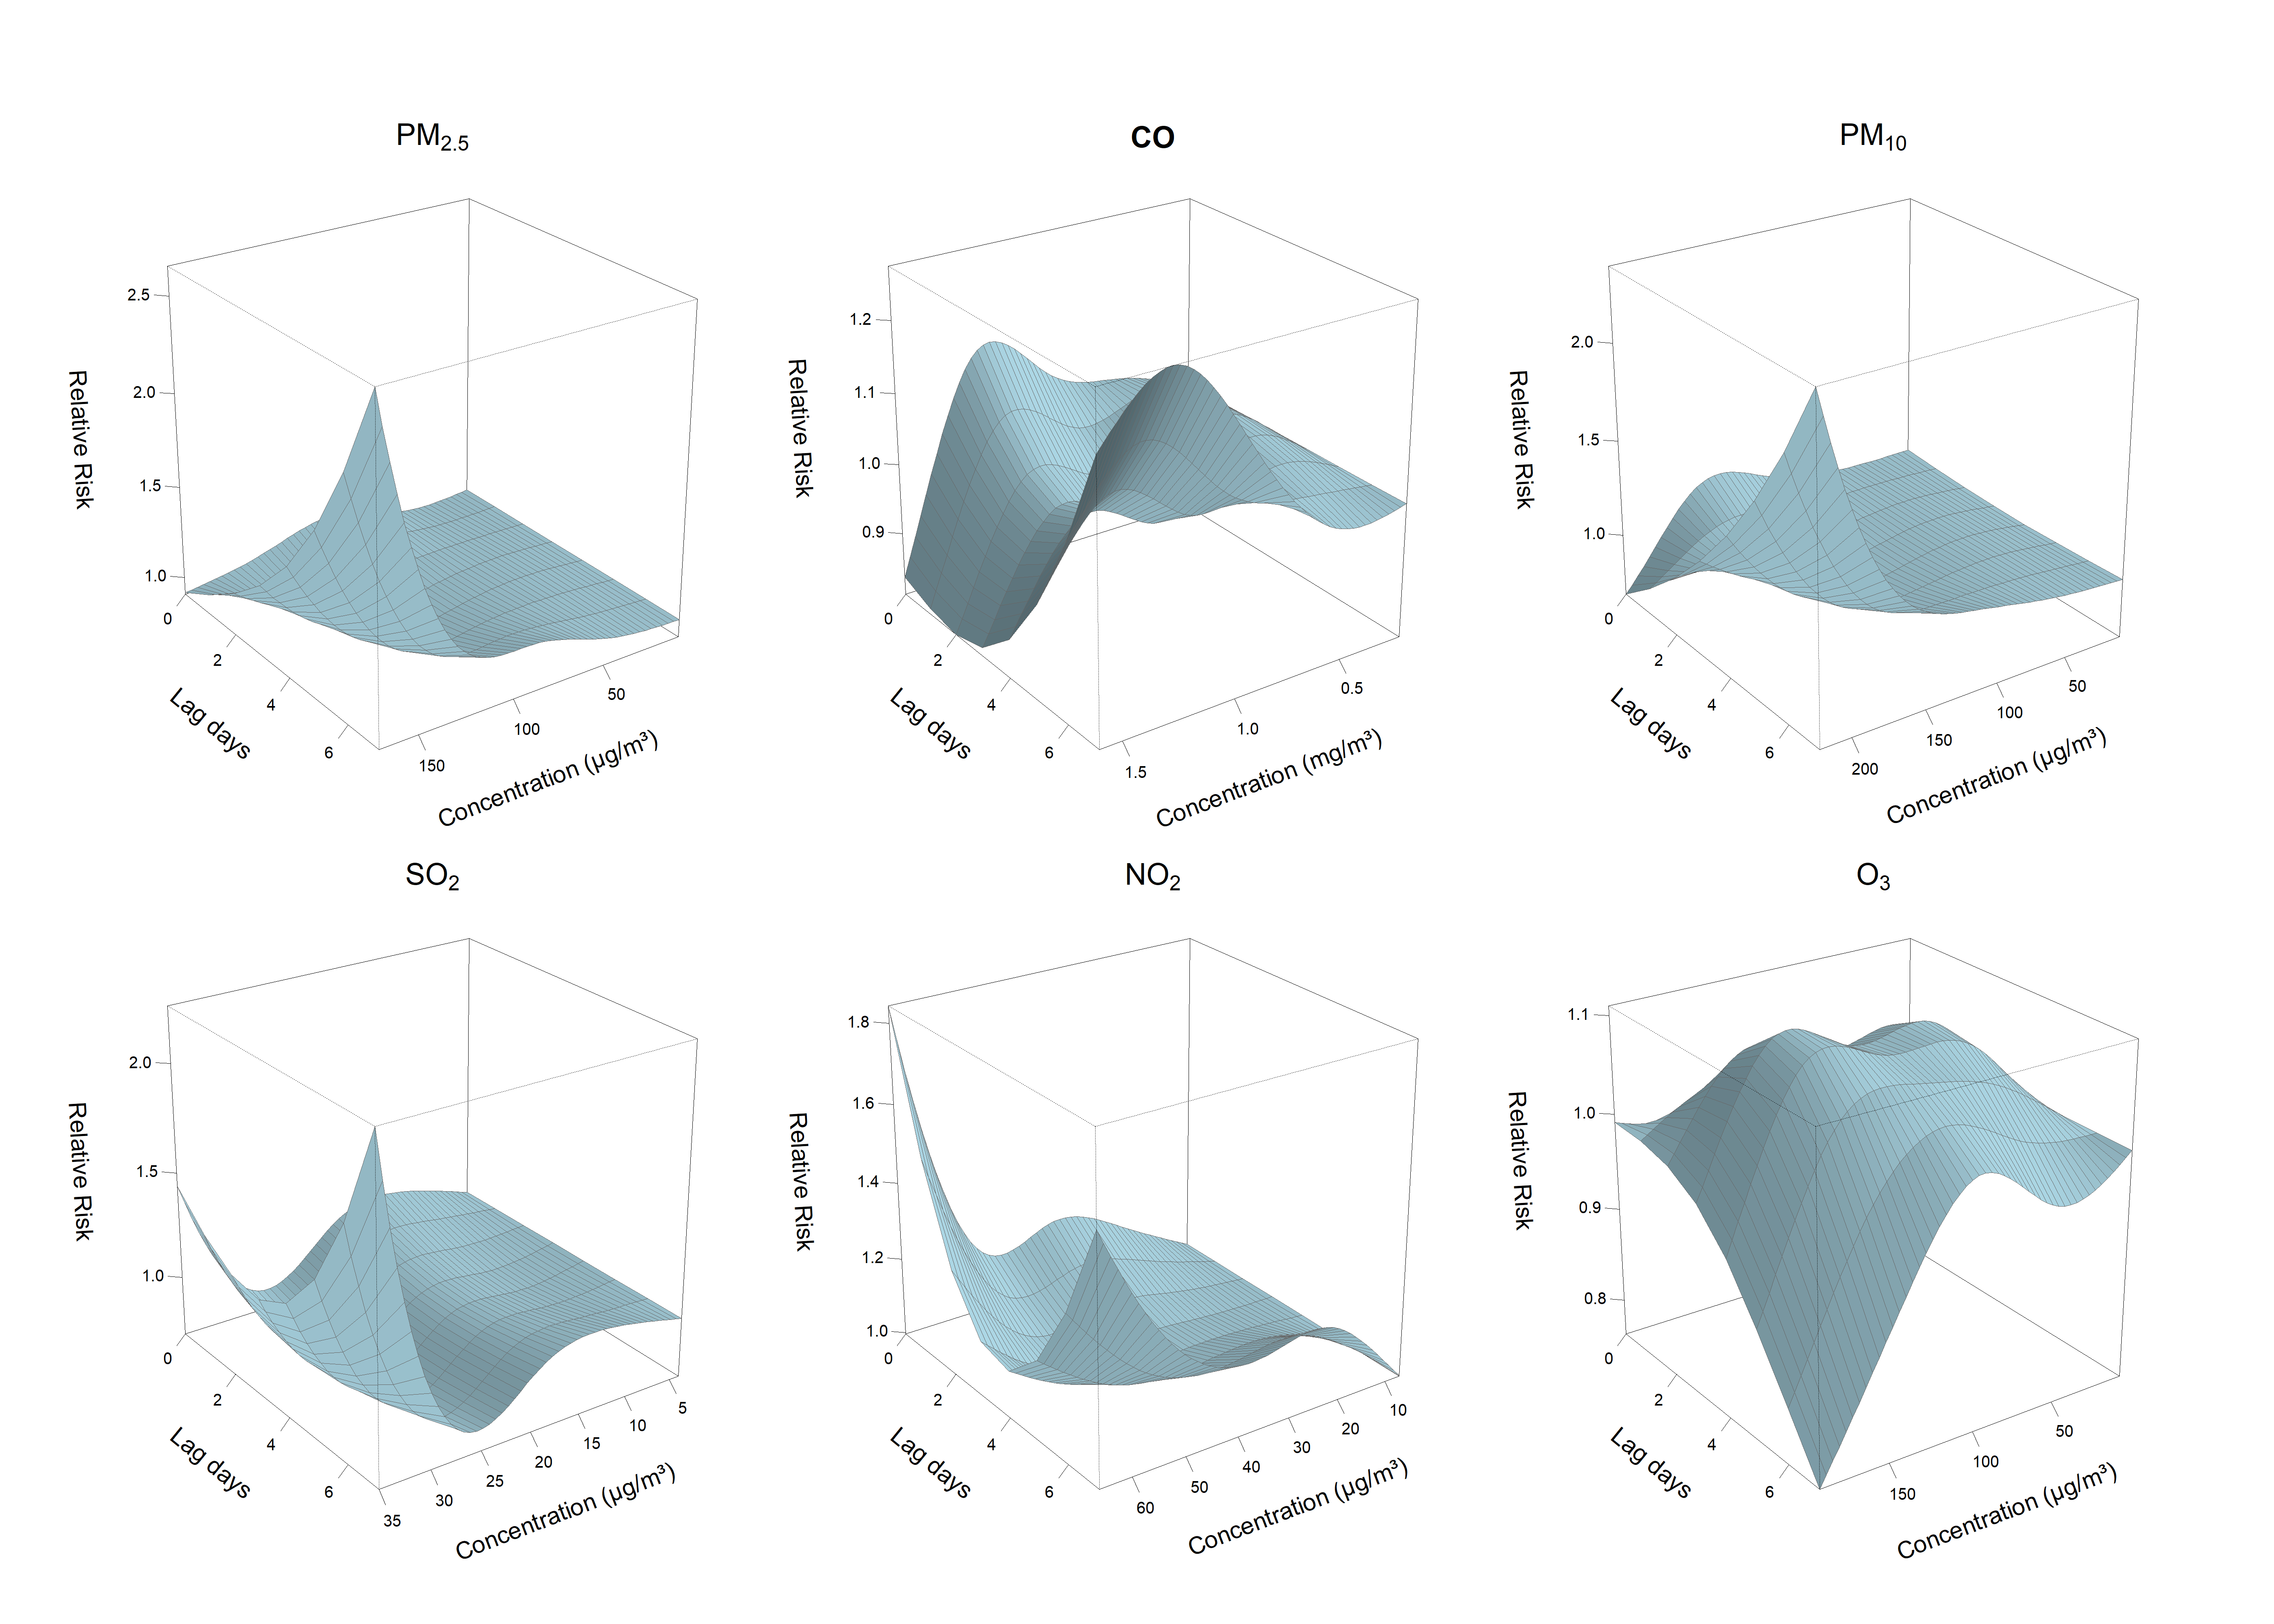


Figure S3. Three-dimensional plot of pollutants (df=6)


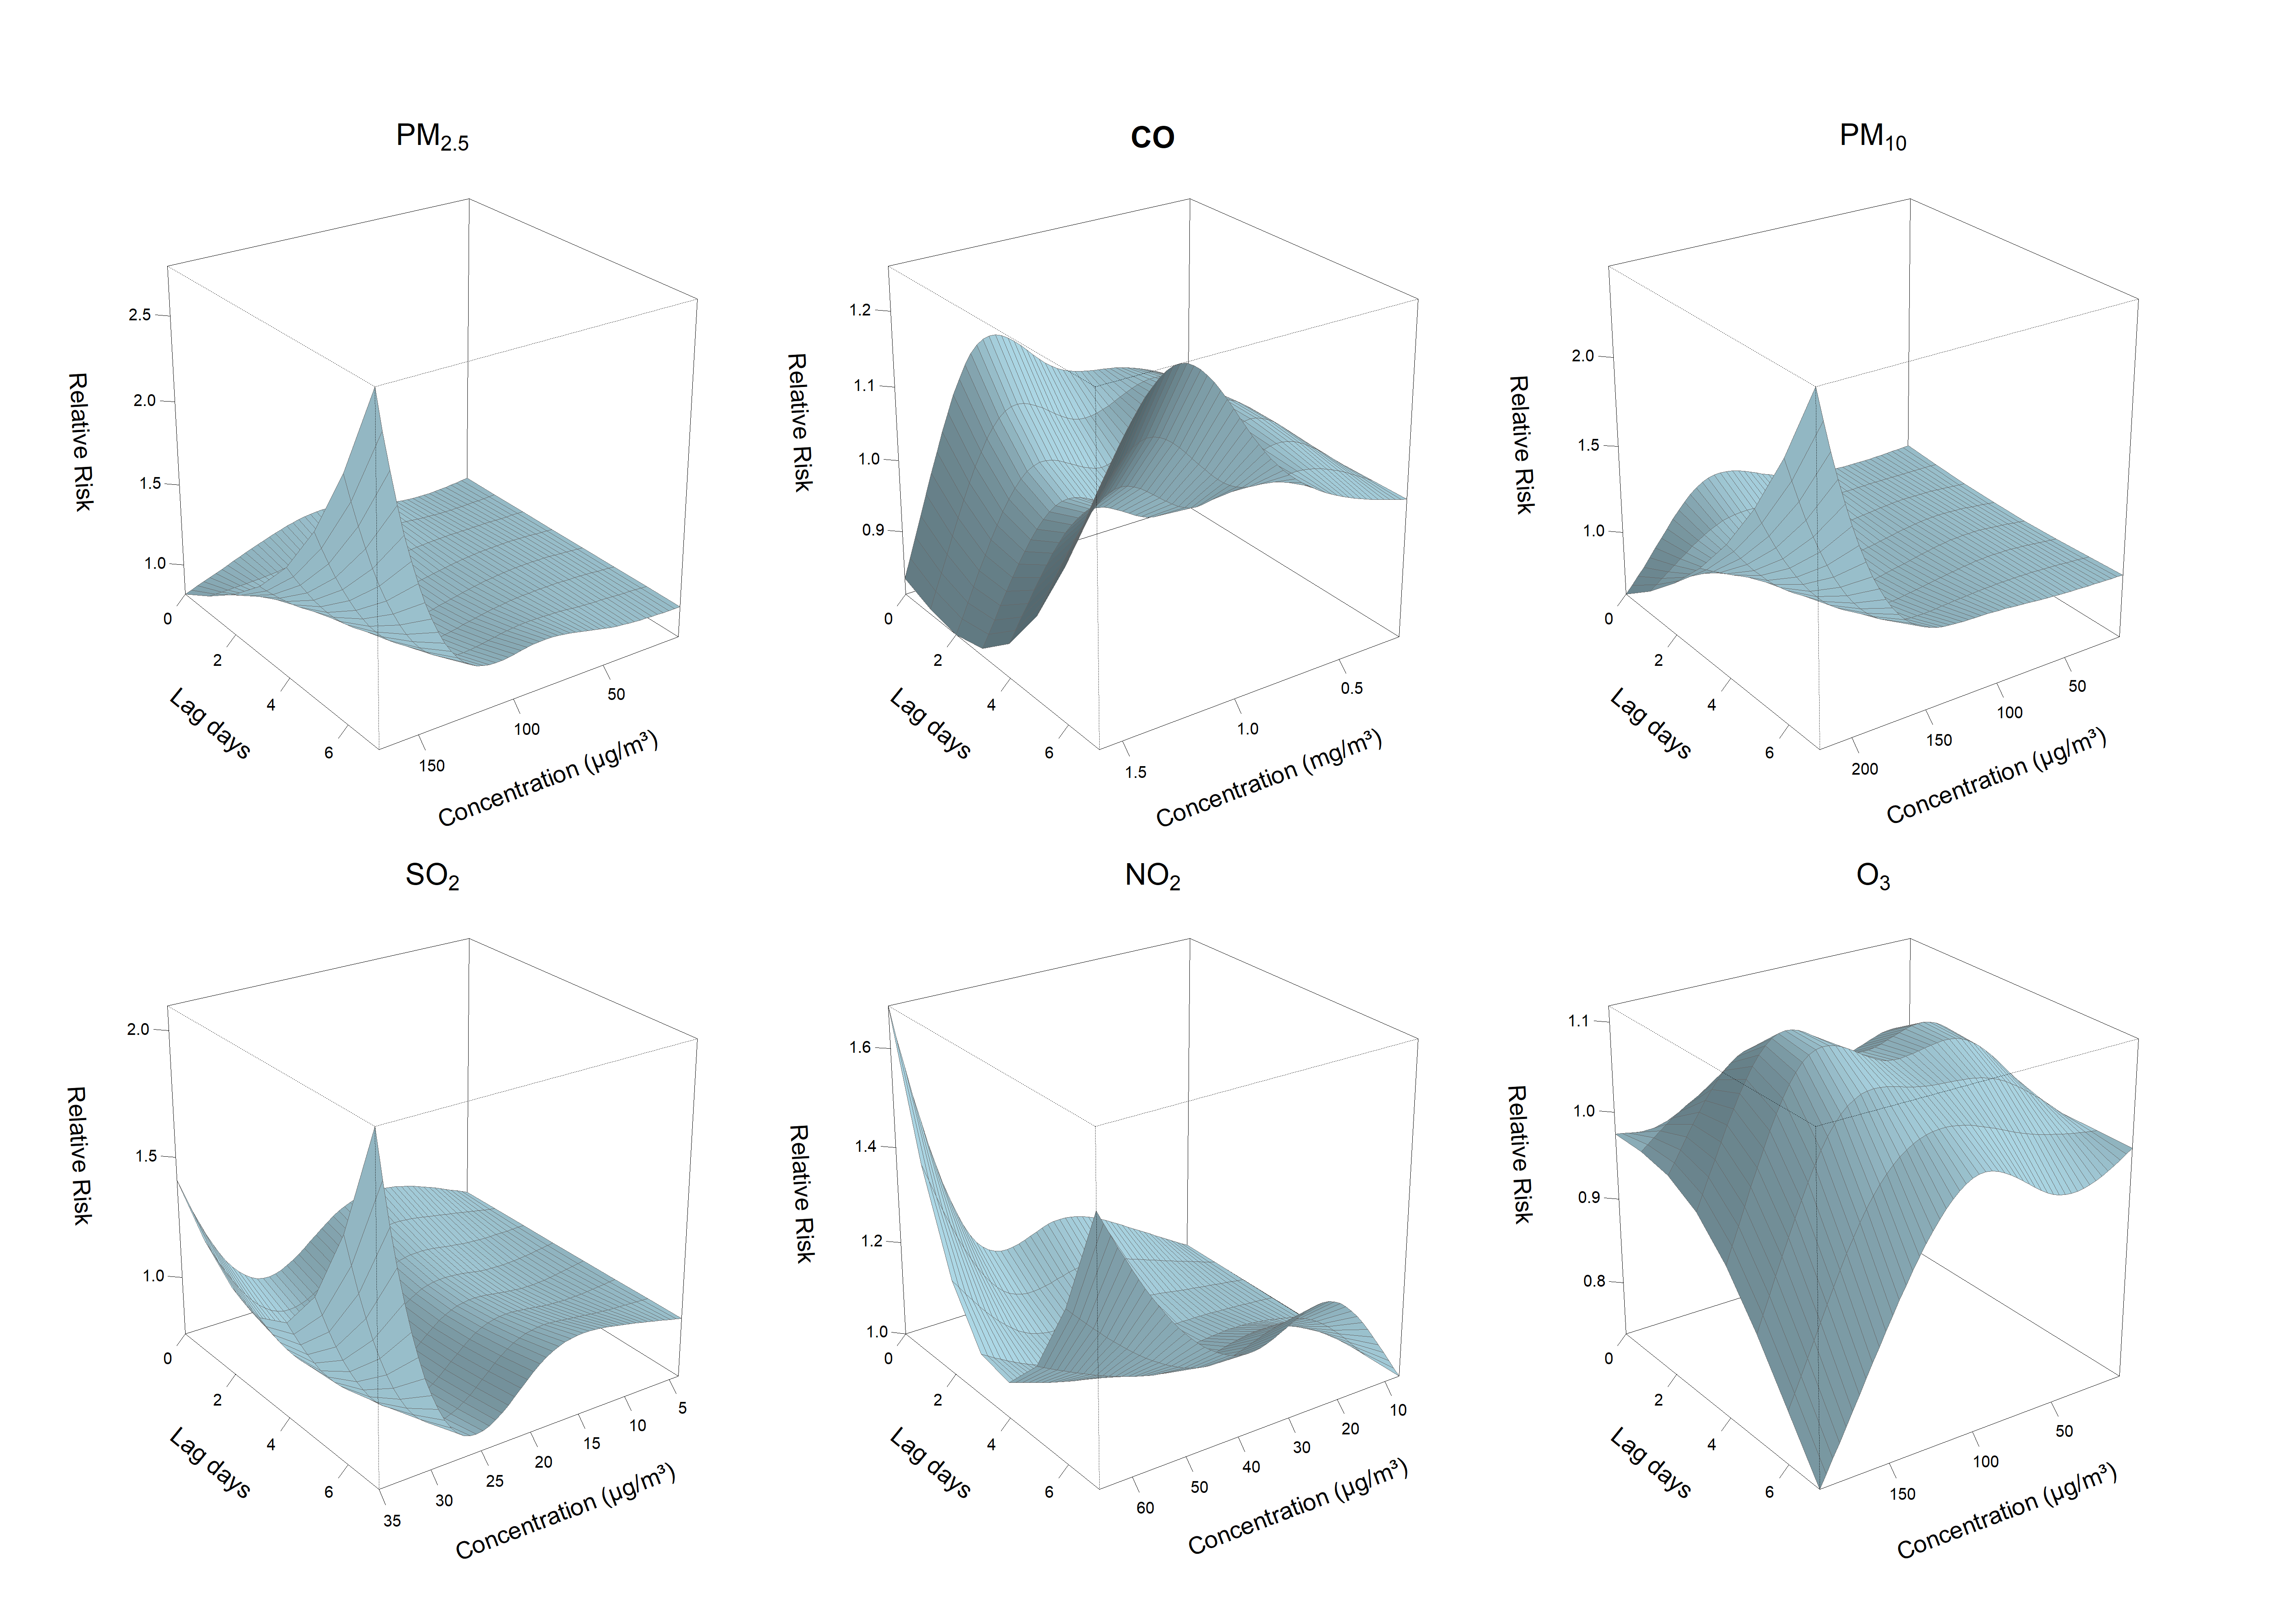


Figure S4. Three-dimensional plot of pollutants (df=8)


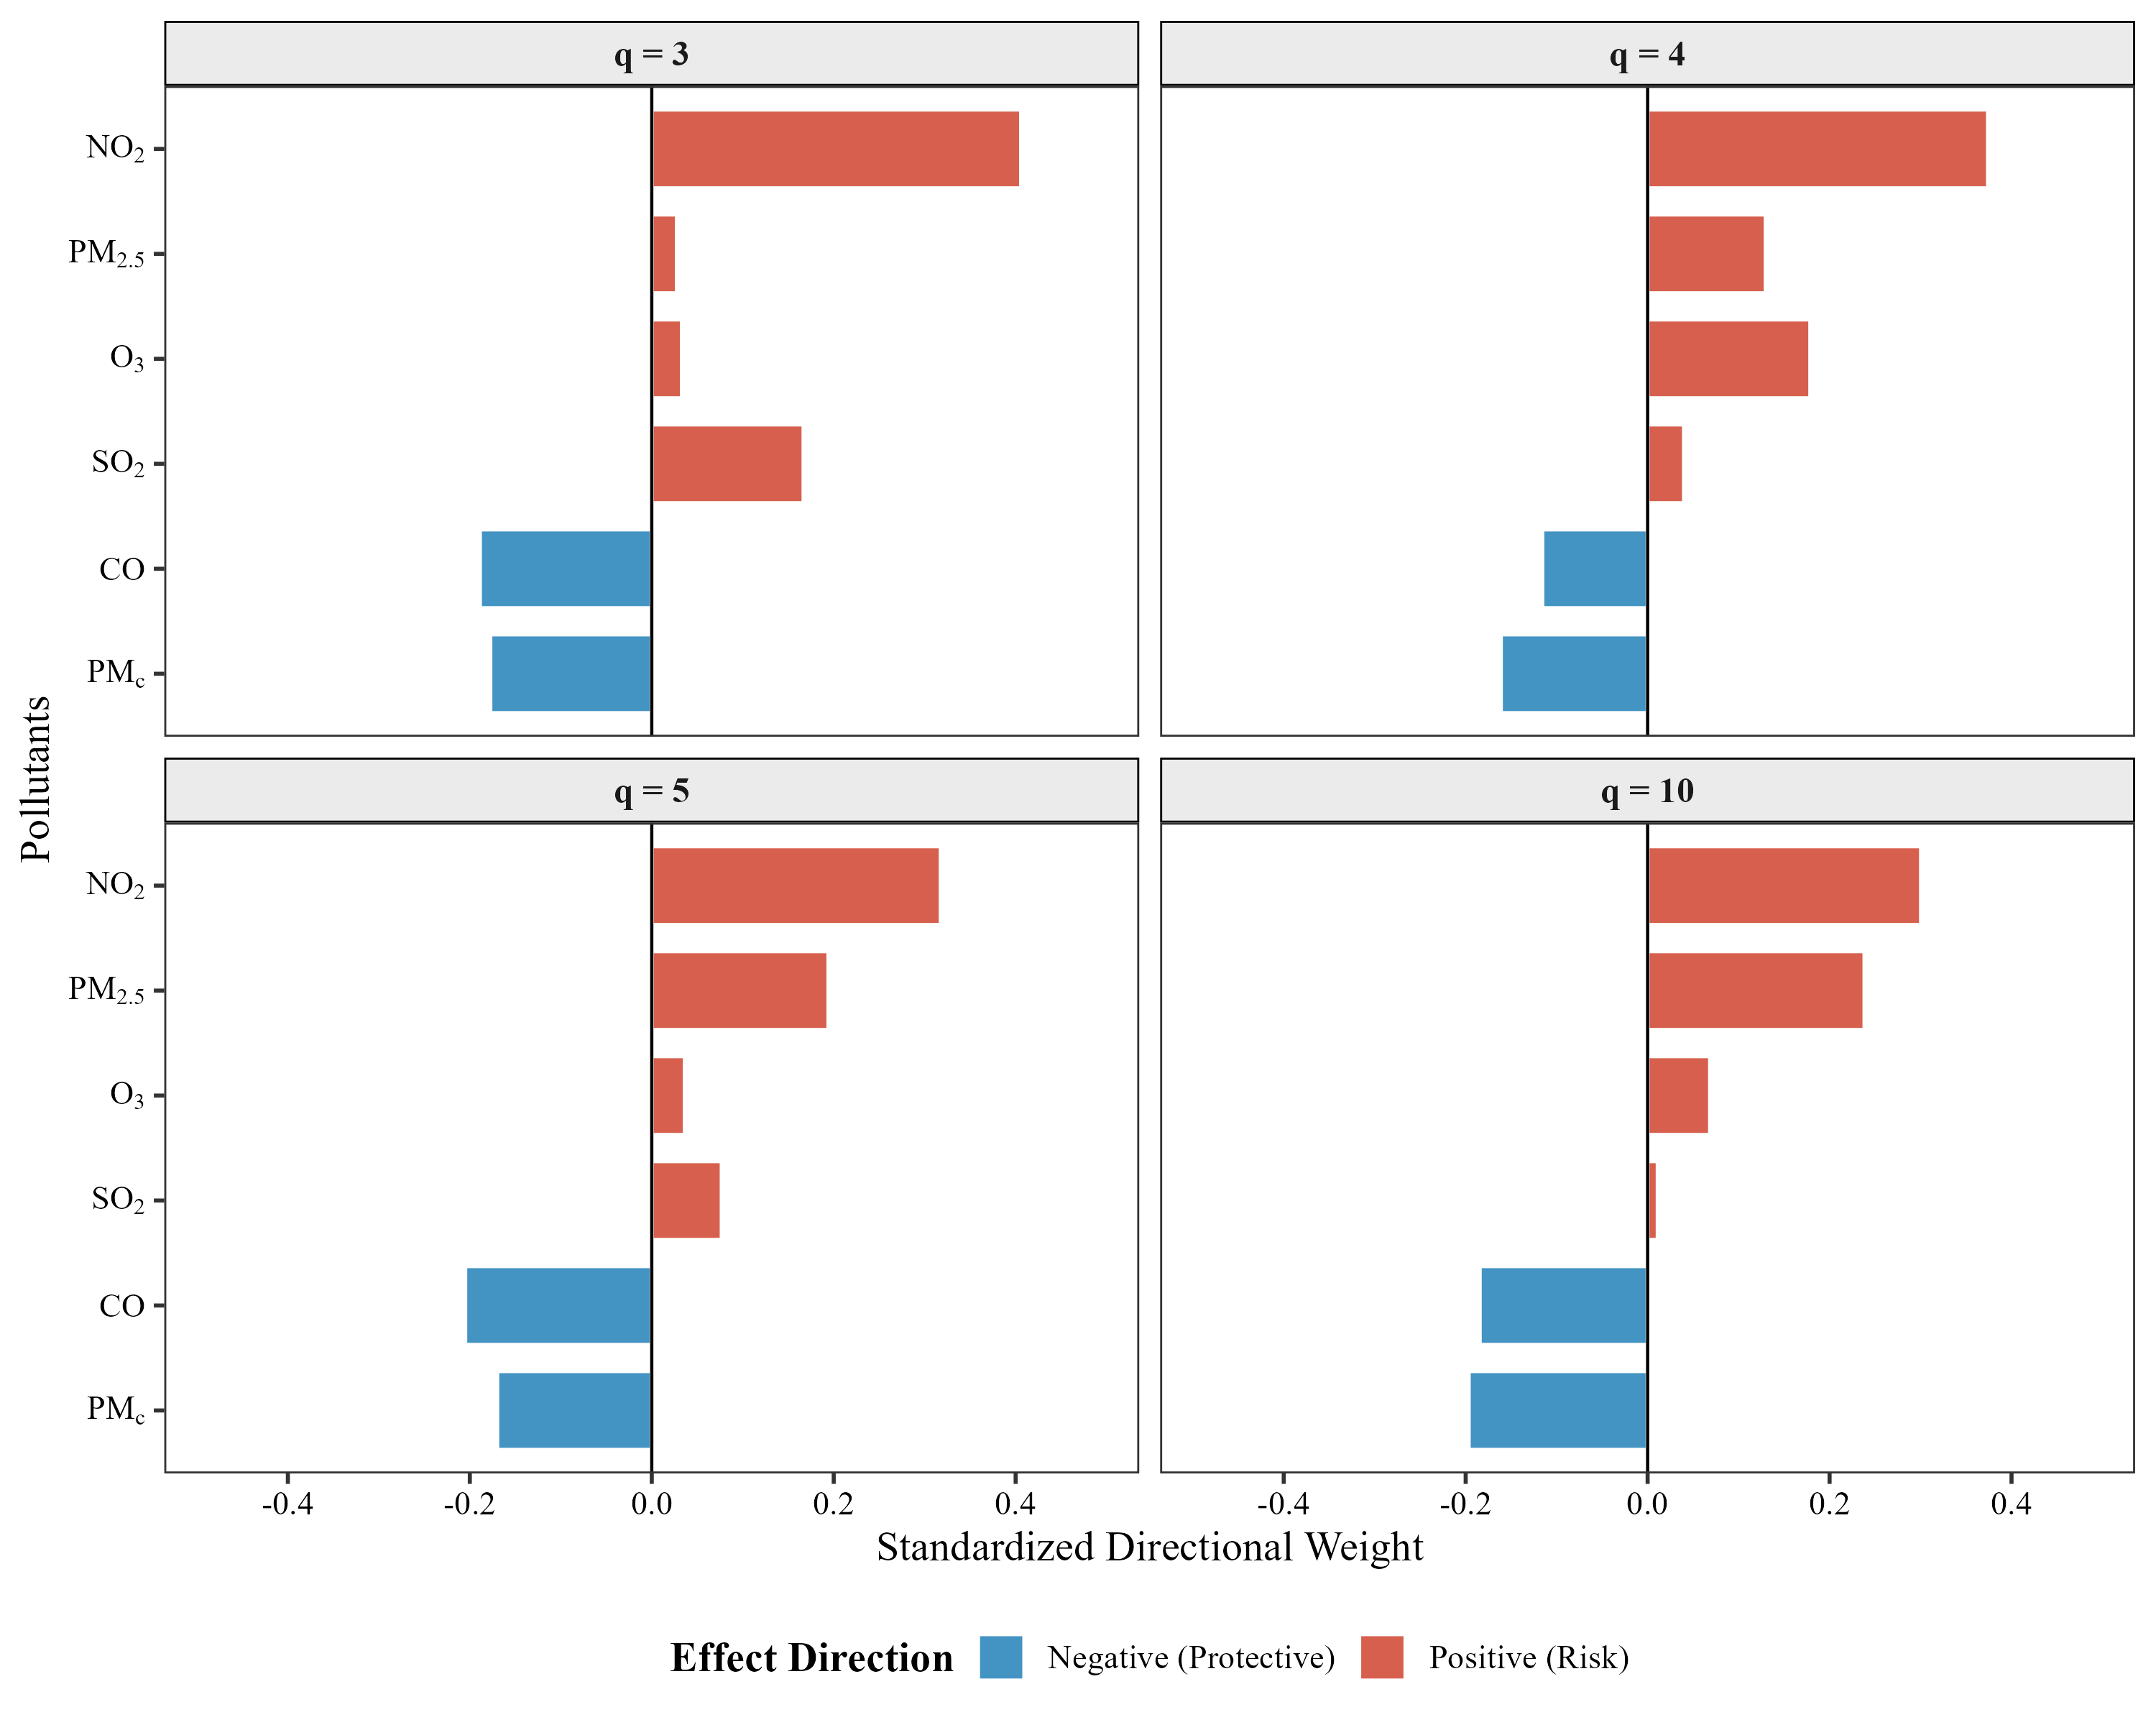


Figure S5. Qgcomp quantile test weight plot (q = 3, 4, 5, 10)


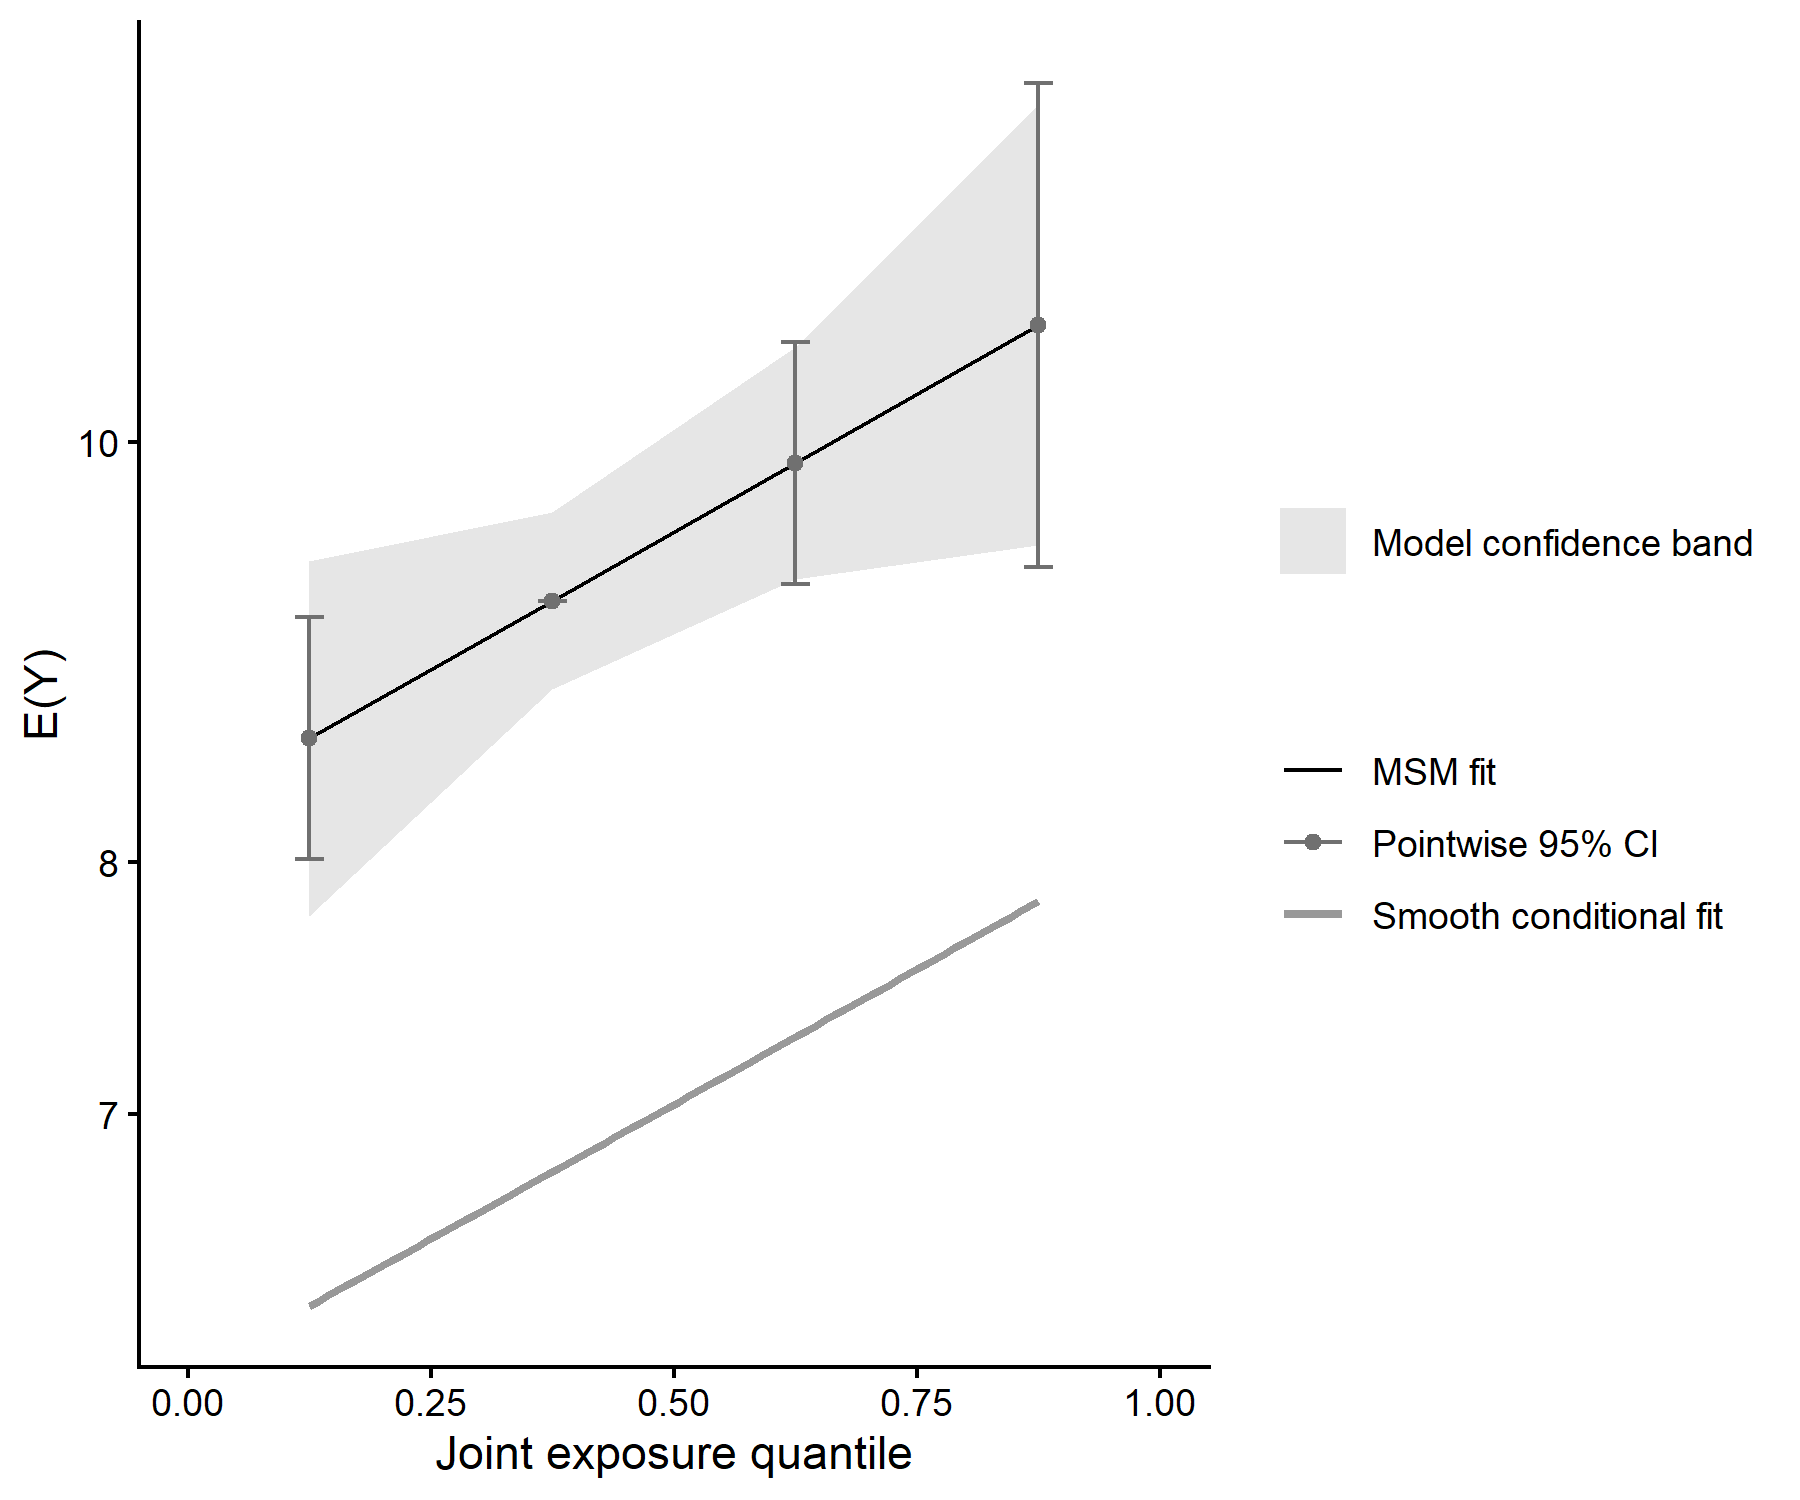


Figure S6. Joint exposure-response relationship for AECOPD hospital admissions

TableS1. Two-pollutant model

| **Adjustment item** | **PM2.5** | **PM10** | **NO2** | **CO** | **O3** | **SO2** |
| --- | --- | --- | --- | --- | --- | --- |
| Single-pollutant model | 1.028 (1.008-1.049) | 1.025 (0.998-1.053) | 1.004 (0.953-1.057) | 1.000 (0.948-1.056) | 1.010 (0.956-1.067) | 1.042 (1.013-1.073) |
| + PM2.5 | - | 1.126 (1.023-1.239) | 1.011 (0.953-1.073) | 0.974 (0.918-1.034) | 0.987 (0.932-1.045) | 1.036 (1.004-1.068) |
| + PM10 | 1.027 (0.970-1.088) | - | 1.020 (0.959-1.084) | 0.972 (0.915-1.032) | 0.978 (0.923-1.036) | 1.031 (1.000-1.064) |
| + NO2 | 0.999 (0.970-1.029) | 0.971 (0.933-1.012) | - | 0.952 (0.895-1.013) | 0.990 (0.935-1.048) | 1.029 (0.999-1.061) |
| + CO | 1.035 (1.013-1.058) | 1.035 (1.004-1.066) | 1.020 (0.966-1.077) | - | 1.003 (0.948-1.061) | 1.041 (1.011-1.072) |
| + O3 | 1.035 (1.014-1.057) | 1.056 (1.023-1.089) | 1.027 (0.974-1.082) | 1.019 (0.963-1.077) | - | 1.043 (1.013-1.074) |
| + SO2 | 1.030 (1.008-1.052) | 1.022 (0.992-1.052) | 1.001 (0.950-1.055) | 0.992 (0.939-1.048) | 0.998 (0.944-1.055) | - |
